# Supplementary material for: Faba Beans for Northwestern Europe: A Multi-Criteria Evaluation for Cold Tolerance and Quality
Source: Research Square preprint supplement (doi:10.21203/rs.3.rs-8647547/v1), 2026-02-03
Supplement: Supplementary file 1 [file 8819c469acda8cad245be800.docx]

**Supplementary material**

**Faba Beans for Northwestern Europe: A Multi-Criteria Evaluation for Cold Tolerance and Quality**

Reena Dubey1, Anne Zaar2, Riccardo Zustovi1, Kevin Dewitte1, Jasper Vlerick1, Sofie Landschoot1, Greet Verlinden1, Elke De Kegel3, Catherine Howarth4, Geert Haesaert1, Steven Maenhout1*

1Department of Plants and Crops, Faculty of Bioscience Engineering, Ghent University, Ghent, Belgium

2 Institute for Breeding Research on Agricultural Crops, Julius Kühn-Institute, Sanitz, Germany

3 Paniflower, Technologiepark Zwijnaarde 104A, 9052 Zwijnaarde ‑ Belgium

4Institute of Biological, Environmental and Rural Sciences, Aberystwyth University, Aberystwyth, UK

* Correspondence: `

[steven.maenhout@ugent.be](mailto:steven.maenhout@ugent.be)

**Supplementary table 1: List of faba bean genotypes evaluated across four seasons**

| **Year1 Winter** | Bumble, Wizard, Honey, Vespa, Norton, Vincent, Trumpet, Allison, Tiffany, GL Magnolia, Jasmin, GL Sunrise, Nakka, Victus, Bolivia, Augusta, Curlew, Pantani, Côte D'or/1, Fernando, GL Arabella, Tundra, Nebraska, GL Alice |
| --- | --- |
| **Year2 Winter** | Wizard, Jasmin, Vincent, Bolivia, Honey, Curlew, Fernando, Augusta, MB21.3, Favino, GL Alice, GL Arabella, Tiffany, Axel, MS 5.2, Norton, Bumble, MS 14.3, Vespa, Magnolia, Cartouche, Côte D'or, MM 1.1, Tundra, Niagara, Nebraska, Allison, Diva, MM3.2, Irena |
| **Year1 Spring** | Allison, Bolivia, Cartouche, Fernando, Fuego, GL Emilia, GL Jasmin, GL Magnolia, GL Sunrise, Nakka, Tiffany, Trumpet, Victus, Futura, Lynx, Genius, Yukon, Macho |
| **Year2 Spring** | Allison, Bolivia, Cartouche, Fernando, Fuego, GL Emilia, GL Jasmin, GL Magnolia, GL Sunrise, Nakka, Tiffany, Trumpet, Victus, Futura, Lynx, Genius, Yukon, Macho |

| **Varieties Baking test** | Tundra, Vincent, Norton, Bumble, Genius, Muris bread, Vespa, GL Emilie, Honey, Fuego, Future, GL Alice, Wizard, GL Sunrise, Melenka, GL Magnolia, Bolivia, Cartouche, Augusta, Fernando, Curlew, GL Jasmin, GL Arabella, Adlon, Mistral, Taifur, Merlin |
| --- | --- |

**Supplementary table 2: List of faba bean genotypes used for baking test**
